# Supplementary material for: Analyses of PD-L1 and Inflammatory Gene Expression Association with Efficacy of Nivolumab ± Ipilimumab in Gastric Cancer/Gastroesophageal Junction Cancer
Source: Oxford University Press journal article supplement (doi:10.1158/1078-0432.ccr-20-2790), 2021-03-29
Supplement: 10780432ccr202790-sup-247494_3_supp_6959428_qpd1x0.xlsx [file 10780432ccr202790-sup-247494_3_supp_6959428_qpd1x0.xlsx]

## Sheet: Supplementary Table 2
ARM	% TC	CPS*	Response (“Non-responder” refers to a response of SD/PD/NE, and “Responder” refers to a response of CR/PR)	OS (months)	OS censoring (1 = censored and 0 = not censored, meaning there was an event)
NIVO 3 + IPI 1	NA	NA	Responder	22.9651	1
NIVO 3 + IPI 1	2	15	Responder	19.7454	1
NIVO 3 + IPI 1	0	2	Non-responder	3.5154	0
NIVO 3 + IPI 1	0	0.1	Non-responder	4.36961	0
NIVO 3 + IPI 1	NA	NA	Non-responder	2.26694	0
NIVO 3 + IPI 1	NA	NA	Non-responder	9.65914	0
NIVO 3 + IPI 1	60	50	Non-responder	22.308	1
NIVO 3 + IPI 1	0	30	Non-responder	0.591376	0
NIVO 3 + IPI 1	0	0	Non-responder	1.577	0
NIVO 3 + IPI 1	1	0.1	Non-responder	16.3614	0
NIVO 3 + IPI 1	3	15	Non-responder	5.48665	0
NIVO 3 + IPI 1	1	5	Non-responder	2.98973	0
NIVO 3 + IPI 1	0	20	Non-responder	1.77413	0
NIVO 3 + IPI 1	0	NA	Non-responder	2.82546	0
NIVO 3 + IPI 1	0	0.1	Non-responder	17.9384	1
NIVO 3 + IPI 1	40	NA	Non-responder	9.19918	0
NIVO 3 + IPI 1	NA	NA	Non-responder	1.74127	0
NIVO 3 + IPI 1	0	5	Non-responder	12.6817	0
NIVO 3 + IPI 1	0	0.1	Non-responder	3.12115	0
NIVO 3 + IPI 1	1	5	Non-responder	2.43121	0
NIVO 3 + IPI 1	0	1	Non-responder	8.44353	0
NIVO 3 + IPI 1	0	20	Non-responder	21.5852	0
NIVO 3 + IPI 1	NA	NA	Non-responder	9.10062	0
NIVO 3 + IPI 1	0	0.1	Non-responder	9.06776	0
NIVO 3 + IPI 1	1	5	Non-responder	7.22793	0
NIVO 3 + IPI 1	0	0.1	Non-responder	4.82957	0
NIVO 3 + IPI 1	0	10	Non-responder	3.41684	1
NIVO 3 + IPI 1	NA	NA	Non-responder	16.4271	1
NIVO 3 + IPI 1	0	10	Non-responder	2.06982	0
NIVO 3 + IPI 1	0	1	Non-responder	9.3963	1
NIVO 3 + IPI 1	0	1	Non-responder	13.6345	0
NIVO 3 + IPI 1	5	0.1	Non-responder	5.55236	0
NIVO 3 + IPI 1	0	0.1	Non-responder	3.90965	0
NIVO 3 + IPI 1	0	30	Non-responder	3.41684	0
NIVO 3 + IPI 1	60	95	Non-responder	1.90554	0
NIVO 3 + IPI 1	NA	NA	Non-responder	3.84394	0
NIVO 3 + IPI 1	0	0	Non-responder	10.6776	0
NIVO 3 + IPI 1	0	NA	Non-responder	1.83984	0
NIVO 3 + IPI 1	0	0.1	Non-responder	1.577	0
NIVO 3 + IPI 1	0	0.1	Non-responder	5.22382	0
NIVO 3 + IPI 1	0	0	Non-responder	13.1745	0
NIVO 3 + IPI 1	0	NA	Non-responder	2.13552	0
NIVO 3 + IPI 1	3	10	Non-responder	1.67556	0
NIVO 3 + IPI 1	NA	NA	Non-responder	1.97125	0
NIVO 3 + IPI 1	0	NA	Non-responder	1.05133	1
NIVO 3 + IPI 1	0	NA	Non-responder	1.47844	0
NIVO 3 + IPI 1	0	10	Non-responder	0.558522	0
NIVO 3 + IPI 1	0	0.1	Non-responder	5.42094	0
NIVO 3 + IPI 1	NA	NA	Non-responder	0.394251	0
NIVO 3 + IPI 1	2	2	Non-responder	10.9076	0
NIVO 3 + IPI 1	25	30	Non-responder	3.02259	0
NIVO 3 + IPI 1	0	NA	Non-responder	15.6715	0
NIVO 3	0	0.1	Responder	16.1643	0
NIVO 3	4	60	Responder	15.0144	0
NIVO 3	NA	NA	Responder	18.9569	1
NIVO 3	100	80	Responder	29.3717	1
NIVO 3	NA	NA	Non-responder	0.689938	0
NIVO 3	0	0.1	Non-responder	18.9897	1
NIVO 3	4	15	Non-responder	19.1869	1
NIVO 3	0	20	Non-responder	2.06982	0
NIVO 3	0	0.1	Non-responder	31.1458	1
NIVO 3	NA	NA	Non-responder	3.35113	0
NIVO 3	0	0.1	Non-responder	18.2669	1
NIVO 3	0	0.1	Non-responder	3.05544	0
NIVO 3	0	NA	Non-responder	9.85626	0
NIVO 3	1	NA	Non-responder	3.12115	0
NIVO 3	1	NA	Non-responder	1.90554	0
NIVO 3	NA	NA	Non-responder	1.54415	0
NIVO 3	NA	NA	Non-responder	2.75975	0
NIVO 3	NA	NA	Non-responder	1.60986	0
NIVO 3	NA	NA	Non-responder	3.44969	0
NIVO 3	0	NA	Non-responder	4.76386	0
NIVO 3	3	5	Non-responder	1.51129	0
NIVO 3	0	20	Non-responder	5.02669	0
NIVO 3	NA	NA	Non-responder	25.0349	0
NIVO 3	0	5	Non-responder	0.821355	0
NIVO 3	0	10	Non-responder	7.72074	0
NIVO 3	0	0.1	Non-responder	27.5318	1
NIVO 3	NA	NA	Non-responder	1.51129	0
NIVO 3	0	5	Non-responder	14.883	0
NIVO 3	NA	NA	Non-responder	8.47639	0
NIVO 3	0	5	Non-responder	2.00411	0
NIVO 3	2	3	Non-responder	2.95688	0
NIVO 3	NA	NA	Non-responder	1.77413	1
NIVO 3	0	NA	Non-responder	4.20534	1
NIVO 3	0	NA	Non-responder	5.12526	0
NIVO 3	4	3	Non-responder	6.73511	0
NIVO 3	0	2	Non-responder	1.67556	0
NIVO 3	0	3	Non-responder	14.7515	0
NIVO 3	NA	NA	Non-responder	29.2731	1
NIVO 3	10	NA	Non-responder	8.9692	0
NIVO 3	0	5	Non-responder	18.924	0
NIVO 3	NA	NA	Non-responder	2.3655	0
NIVO 3	0	0	Non-responder	19.1211	1
NIVO 3	0	5	Non-responder	15.5072	0
NIVO 3	NA	NA	Non-responder	14.9815	1
NIVO 3	10	60	Non-responder	1.21561	0
NIVO 3	NA	NA	Non-responder	1.31417	0
NIVO 3	NA	NA	Non-responder	5.38809	1
NIVO 3	0	NA	Non-responder	4.59959	0
NIVO 3	0	NA	Non-responder	4.40246	0
NIVO 3	NA	NA	Non-responder	4.07392	1
NIVO 3	2	NA	Non-responder	1.41273	1
NIVO 3	10	2	Non-responder	1.01848	0
NIVO 3	1	20	Non-responder	6.2423	0
NIVO 3	95	100	Non-responder	12.9117	0
NIVO 3	2	3	Non-responder	3.35113	0
NIVO 3	45	80	Non-responder	12.4189	0
NIVO 3	0	5	Non-responder	2.26694	0
NIVO 3	0	7	Non-responder	17.7413	1
NIVO 3	0	0.1	Non-responder	3.31828	0
NIVO 1 + IPI 3	4	10	Responder	21.8152	1
NIVO 1 + IPI 3	1	15	Responder	26.4476	1
NIVO 1 + IPI 3	0	10	Responder	23.4908	1
NIVO 1 + IPI 3	0	10	Responder	21.5852	1
NIVO 1 + IPI 3	1	10	Responder	24.4764	1
NIVO 1 + IPI 3	0	NA	Responder	22.2752	1
NIVO 1 + IPI 3	0	5	Responder	20.0082	1
NIVO 1 + IPI 3	0	NA	Responder	11.4661	0
NIVO 1 + IPI 3	0	25	Responder	11.9918	1
NIVO 1 + IPI 3	1	NA	Responder	8.83778	0
NIVO 1 + IPI 3	NA	NA	Non-responder	0.919918	0
NIVO 1 + IPI 3	NA	NA	Non-responder	1.41273	0
NIVO 1 + IPI 3	0	1	Non-responder	3.0883	0
NIVO 1 + IPI 3	0	NA	Non-responder	0.722793	0
NIVO 1 + IPI 3	0	1	Non-responder	4.10678	0
NIVO 1 + IPI 3	0	0.1	Non-responder	4.10678	0
NIVO 1 + IPI 3	0	NA	Non-responder	1.87269	0
NIVO 1 + IPI 3	0	5	Non-responder	6.47228	0
NIVO 1 + IPI 3	1	NA	Non-responder	1.21561	0
NIVO 1 + IPI 3	0	0.1	Non-responder	8.83778	0
NIVO 1 + IPI 3	0	3	Non-responder	0.821355	0
NIVO 1 + IPI 3	NA	NA	Non-responder	3.61396	0
NIVO 1 + IPI 3	3	20	Non-responder	2.49692	0
NIVO 1 + IPI 3	0	5	Non-responder	23.3922	0
NIVO 1 + IPI 3	0	3	Non-responder	5.02669	0
NIVO 1 + IPI 3	0	0.1	Non-responder	18.694	1
NIVO 1 + IPI 3	1	10	Non-responder	26.4805	1
NIVO 1 + IPI 3	0	1	Non-responder	1.01848	0
NIVO 1 + IPI 3	2	20	Non-responder	3.44969	0
NIVO 1 + IPI 3	0	1	Non-responder	2.98973	0
NIVO 1 + IPI 3	0	2	Non-responder	0.689938	0
NIVO 1 + IPI 3	0	2	Non-responder	0.887064	0
NIVO 1 + IPI 3	0	0.1	Non-responder	7.16222	0
NIVO 1 + IPI 3	0	0.1	Non-responder	9.79055	0
NIVO 1 + IPI 3	0	5	Non-responder	2.49692	0
NIVO 1 + IPI 3	NA	NA	Non-responder	9.92197	1
NIVO 1 + IPI 3	NA	NA	Non-responder	9.56057	0
NIVO 1 + IPI 3	0	0	Non-responder	1.34702	0
NIVO 1 + IPI 3	0	NA	Non-responder	4.04107	0
NIVO 1 + IPI 3	NA	NA	Non-responder	2.20123	0
NIVO 1 + IPI 3	0	5	Non-responder	4.89528	1
NIVO 1 + IPI 3	0	5	Non-responder	3.74538	0
NIVO 1 + IPI 3	0	0.1	Non-responder	4.27105	1
NIVO 1 + IPI 3	NA	NA	Non-responder	17.9384	0
NIVO 1 + IPI 3	60	NA	Non-responder	4.50103	0
NIVO 1 + IPI 3	0	NA	Non-responder	15.1458	0
NIVO 1 + IPI 3	0	0.1	Non-responder	6.86653	0
NIVO 1 + IPI 3	0	70	Non-responder	15.5729	0
NIVO 1 + IPI 3	2	10	Non-responder	19.5154	1
NIVO 1 + IPI 1	0	0.1	Non-responder	3.25257	0
NIVO 1 + IPI 1	0	0.1	Non-responder	9.85626	0
NIVO 1 + IPI 1	5	0	Non-responder	8.77207	0
*A CPS of <1 was treated as 0.1 for plotting and analysis purposes
